# Supplementary material
Source: PubMed Central journal article supplement (PMC5373776)
Supplement: supp_WNL.0000000000003778_Supplemental_Data.pdf [file supp_WNL.0000000000003778_Supplemental_Data.pdf]

## Supplemental Data

### Table of contents

- ✓ **E-Methods**
  - Isolation of crude central nervous system synaptosomes
  - Immunoprecipitation assay
  - Electrophoresis and mass-spectrometry analysis
  - Differential proteomic and functional analysis
- ✓ **Table e-1.** Shortlisted immunoprecipitated proteins
- ✓ **Table e-2.** Identified precipitated peptides of Caspr2, DCC and UNC5A proteins
- ✓ **Figure e-1.** Detection of Caspr2, DCC or UNC5A antibodies with a HEK293T cell based-assay
- ✓ **Table e-3.** Immunohistochemistry of Caspr2, DCC and UNC5A proteins on thymomas and normal thymic tissues
- ✓ **Figure e-2.** Immunohistochemical studies on normal thymic tissues
- ✓ **References.**

### **E-Methods**

**Isolation of crude central nervous system synaptosomes.** Crude synaptosome fractions were prepared from whole rat brain by differential centrifugation method with minimal modifications.<sup>e1</sup> One male Wistar rat (2 months, Charles River Laboratories, Saint-Germain-sur-l'Arbresle, FR) per experiment was euthanized with CO<sub>2</sub> in an appropriate chamber. Brain was quickly removed, dissected on ice, and homogenized in isotonic sucrose/EDTA buffer (0.32 M sucrose, 1mM EDTA, 5mM Tris pH 7.4 with protease inhibitor cocktail III [P8340; Sigma Labs, St.Louis, US]) using 15 mL teflon-glass tissue grinder at 4°C. The homogenate was centrifuged at 1,000g 10 min at 4°C using Sorvall SS34 fixed angle rotor. The supernatant (S1, *total brain homogenate*) was diluted to a final protein concentration of 5mg/ml with isotonic sucrose/EDTA buffer. Afterwards, the diluted S1 supernatant was centrifuged at 15,000g 30 min 4°C, and the pellet (P2) containing the *crude*

*synaptosome fraction* isolated. This fraction contains the bulk of the synaptosomes and plasma membrane from nerves and glial cells, myelin and mitochondria.

**Immunoprecipitation assay.** Crude synaptosome fractions were incubated with patient's or control serum (1:100) in isotonic sucrose/EDTA buffer (0.32 M sucrose, 1mM EDTA, 5mM Tris pH 7.4 with protease inhibitor cocktail III [all from Sigma Labs]) overnight at 4°C. After the incubation, samples were washed three times with isotonic sucrose/EDTA buffer, and treated with lysis buffer (150mM NaCl, 1mM EDTA, 100mM Tris-HCl, 1% triton X-100 and 1% sodium deoxycholate pH 7.5 with 1:100 protease inhibitor cocktail III [all from Sigma Labs]). Lysed synaptosomes were then centrifuged at 21,300g 30 min at 4°C and supernatant was retained and incubated with protein A/G agarose beads (20423; Pierce, Rockford, US) overnight at 4°C.

**Electrophoresis and mass-spectrometry analysis.** Antibody coated protein A/G beads were washed three times with phosphate-buffered saline (PBS), and the pellet was resuspended in Laemmli buffer, boiled for 10 min and separated in 4-12% Bis-Tris polyacrylamide NuPAGE precast gels (Invitrogen). EZBlue gel staining (G1041; Sigma Labs) was used to visualize proteins. Because EZBlue gel staining did not identify specific protein bands, gel lanes were cut out and sent to the Proteomics Unit from the University of Valencia (member of Proteored, PRB2-ISCI). Samples were digested using sequencing grade trypsin (Promega, Madison, WI, USA) as described elsewhere.<sup>e2</sup> The digestion mixture was dried in a vacuum centrifuge and resuspended in 10µL of 2% acetonitrile (ACN), 0.1% trifluoro acetic acid (TFA). Mass spectrometry analysis was performed by loading 5µL of tryptic peptides onto a trap column (NanoLC Column, 3µ C18-CL, 75µm x 15cm, Eksigent, Dublin,US), desalted with 0.1% TFA at 2µL/min for 10 min, and transferred afterwards onto an analytical column (LC Column, 3µm C18-CL, 75µm x 12cm; Nikkyo Technos, Tokyo, JP) equilibrated in 5% ACN 0.1% formic acid (FA). Elution was carried out with a linear gradient of 5 to 40% B in 45 min (A: 0.1% FA; B: ACN, 0.1% FA) at a flow rate of 300 nL/min. Mass spectrometry analysis was performed in a nanoESI qTOF (5600 TripleTOF; ABSCIEX, Old Connecticut Path Framingham,USA) mass spectrometer operated in data-dependent

mode. Peptides were ionized applying 2.8kV to the spray emitter. Survey MS1 scans were acquired from 350-1250 m/z for 250 ms. The quadrupole resolution was set to 'UNIT' for MS2 experiments, which were acquired from 100-1500m/z for 50 ms in 'high sensitivity' mode. Following switch criteria were used: charge: 2+ to 5+; minimum intensity; 70 counts per second (cps). Up to 50 ions were selected for fragmentation after each survey scan. Dynamic exclusion was set to 15s.

NCBI database was searched with Mascot v2.3.02 (Matrix Science, London, UK) and ProteinPilot v4.5 (ABSCIEX) search engines using peak list files (mgf) generated with ProteinPilot from the instrument wiff files. Mascot search parameters included tryptic peptides with up to 1 missed cleavage, mass tolerance of 50 ppm in MS mode and 0.6 Da in MS/MS mode, carbamidomethylation of Cys as a fixed modifications, and no taxonomy restriction. ProteinPilot search parameters were trypsin specificity, cys-alkylation, no taxonomy restriction and the search effort set to through. A 95% protein confidence cut-off value was used (ProteinPilot, Unused>1.3; <http://sciex.com/Documents/tech%20notes/ProteinPilot-Software-Overview-RUO-MKT-02-1777-A.pdf>).

**Differential proteomic and functional analysis.** Protein abundance was estimated by a label-free approach based on peptide signal intensity.<sup>e3</sup> The signal of the three most intense peptides with confidence > 95% was used as a measure of the protein abundance in each sample.

Immunoprecipitated proteins by patients with neuromyotonia and tymoma were compared with those identified with controls. All proteins identified with control sera were not considered for further analysis. Universal Protein Resource (UniProt; available at [www.uniprot.org](http://www.uniprot.org)) and Online Mendelian Inheritance in Men (OMIM; available at [www.omim.org](http://www.omim.org)) databases were used to evaluate subcellular location and functional analysis of the proteins respectively.

**Table e-1. Shortlisted immunoprecipitated proteins** (membrane proteins highlighted).

| Protein name                                                   | Gene     | Gi number    | Subcellular location                           |
|----------------------------------------------------------------|----------|--------------|------------------------------------------------|
| 60S ribosomal protein L18                                      | Rpl18    | gi 89573867  | Cytoplasm                                      |
| Adenylate cyclase type 5                                       | Adyc5    | gi 149060612 | Membrane, cell projection (cilium)             |
| Aquaporin-4                                                    | Aqp4     | gi 6978531   | Membrane                                       |
| Capping protein (actin filament) muscle Z-line                 | N/A      | gi 149065041 | Cytoplasm                                      |
| Choline O-acetyltransferase                                    | Chat     | gi 282154809 | Cytoplasm, nucleus                             |
| Collapsin response mediator protein 3                          | Crmp3    | gi 3122037   | Cytoplasm                                      |
| Collapsin response mediator protein 5                          | Crmp5    | gi 6714522   | Cytoplasm, dendrite                            |
| Contactin-associated protein-like 2                            | Caspr2   | gi 7662350   | Membrane, cell projection (axon)               |
| Deleted in colorectal carcinoma                                | Dcc      | gi 149064590 | Membrane                                       |
| Furry-like protein                                             | Fry      | gi 189342174 | Cytoplasm                                      |
| Golgin subfamily A member 3                                    | Golga3   | gi 157822655 | Golgi apparatus                                |
| Leucine-rich repeats and immunoglobulin-like domains protein 2 | Lrig2    | gi 68299752  | Membrane, cytoplasm                            |
| Malonyl-CoA decarboxylase                                      | Mlycd    | gi 67460103  | Cytoplasm, mitochondrion and peroxisome matrix |
| Metabotropic glutamate receptor 3                              | Grm3     | gi 157787068 | Membrane                                       |
| Metabotropic glutamate receptor 5                              | Grm5     | gi 8393490   | Membrane                                       |
| Netrin receptor UNC5A precursor                                | Unc5a    | gi 11559980  | Membrane, membrane raft, cell projection       |
| Neurexin-1                                                     | Nrx1     | gi 37620151  | Membrane, cell junction (synapse)              |
| Neurocan core protein                                          | Ncan     | gi 404312657 | Extracellular matrix                           |
| Phospholipase C, beta 1                                        | Plcb1    | gi 149023393 | Nucleus, cytoplasm                             |
| Protein furry homolog-like                                     | Fryl     | gi 293341689 | Cell cortex                                    |
| Septin 7                                                       | Sept7    | gi 9789715   | Cytoskeleton                                   |
| Serine/threonine-protein kinase MRCK                           | Cdc42bpa | gi 16758474  | Cytoplasm                                      |
| Vacuolar protein sorting-associated protein 16                 | Vps16    | gi 53850610  | Lysosomal membrane                             |

Sequence identifier GI number from National Centre for Biotechnology Information (NCBI) database available at:

<http://www.ncbi.nlm.nih.gov/protein/>. N/A: no data available.

**Table e-2. Identified precipitated peptides of Caspr2, DCC and UNC5A proteins.**

| Protein name                        | Peptide sequence                                                                                                                                                                                                            | Unused | GI number   | %Cov  | Specie                   |
|-------------------------------------|-----------------------------------------------------------------------------------------------------------------------------------------------------------------------------------------------------------------------------|--------|-------------|-------|--------------------------|
| Contactin-associated protein-like 2 | DAGFLSYKDHLPPVSVVVGDT-DRQGSEAK, VQFNHIAPLK, VIETGKIDQEIHKYNTPGFTGCLSR.                                                                                                                                                      | 3.33   | gi 7662350  | 4,8%  | <i>Homo sapiens</i>      |
| Deleted in colorectal carcinoma     | GNIQTFTVFFSR, GVGPLSDPILFR, HHKPDEGLYQCEASLGDSGSIISR, VVVLPSGALQISR, NGDVVIPSDYFQIVGGSNLR, DVVPVLVSSR, ILSDPGLHR, VMVAGPLR, FLAYNR, DLTVITR, HGDGGYWPVDTNLIDR.                                                              | 10.12  | gi 6978755  | 11,7% | <i>Rattus norvegicus</i> |
| Netrin receptor UNC5A               | STDSSSGLPTMEVR, FALVGEALSVAATKR, FQLSNGHLLSPLGSGR, GTSNMAYGTFNFLGGR, HTLHHSSPTSEAEDFVSR, IPFLIR, KKEGLSDSDVADSSILTSGFQPVSIIK PSK, LMIPNTGISLLIPPDAIPR, LSIHDVPSSLWK, NKPVLLVCK, QLGGQLIQEPR, QVDHVIER, VYCLHDTHDALKEVVQLEK. | 1.59   | gi 11559980 | 21,2% | <i>Rattus norvegicus</i> |

### Contactin-associated protein-like 2

mqaapragcg aalllwivss clcrawtaps tsqkdeplv sglphvafss sssisgsysp  
 gyakinkrgg aggwspdsd hyqwlqvdfg nrkqisaiat qgrysssdw tqyrmysdt  
 grnwkpqhgd gniwafpgni nsdgvvrhel qhpiaryvr ivpldwngeg riglrievyg  
 csywadvinf dghvvlpyrf rnkkmktlkd vialnftkse segvilhgeg qggdyitlel  
 kkaklvslsln lgsnqlgpiy ghtsvmtgsl lddhhwhsvv ierqgrsinl tldrsmqhfr  
 tngefdylld dyeitfggip fsgkpssssr knfkgcmesi nyingvnitdl arrkklepn  
 vgnlsfscve pytvpvffna tsylevpgrl nqdlfsvsfq frtwnpngll vshfadnlr  
 nveidltesk vgvhinitqt kmsqidissg sglndgqwe vrflakenfa iltidgdeas  
 avrtnsplqv ktgekyffgg flnqmnssh svlqpsfqqc mqliqvddql vnlyevaqrk  
 pgsfanvsid mcaiidrcvp nhcehgkcs qtwdsfkctc detgysgatc hnsiyepsce  
 aykhlgqtsn yywidpdgsg plgplkvycn mtedkvwtiv shdlmqatpv vgynekyysv  
 tqlvysasmd qisaitdsae yceqyvsyfc kmsrllntpd gspytwwvgk anekhywgg  
 sgpqiakcac giernctdpk yycncdadyk qwrkdagfls ykdhlpvsqv vvgdtdrqqg  
 eaklsvgplr cggdrnywna asfpnpssyl hfstfqqets adisyfktl tpwgvflemn  
 gkedfiklel ksatevsfsf dvgnpveiv vrsptplndd qwhrvtaern vkqaslqvdr  
 lpqqirkapt eghtrlelyl qlfvvgaggq qgflgcirsl rmngvtldle erakvtsgfi  
 sgcsghtctsy gtncenggkc leryhgyscd csntaydgtf cnkdvgaffe egmwlrynfq  
 apatnards ssvdnadpqq nshpdlagee irfsfsttka pcillyissf ttdflavlvk  
 ptgslqiryng lggtrepyini dvdhrnmang qphsvnitrh ektiflklhd ypsvsvhpls  
 ssdtlfnspk slflgkviet gkidqeihky ntpgftgcls rvqfnqiapl kaalrqtnas  
 ahvhiqqgelv esncgasplt lspmssatdp whldhldsas adfpynpggg qairngvnrn  
 saiiggiav viftilctlv fliryfmrhk gtyhtneakg aesaesadaa imndpnfte  
 tideskkewl i

## Deleted in colorectal carcinoma

menslgcvvw pklafvlfga sllsahlqvt gfqikpftsl hfvsepsdav tmrggnvlln  
 csaesdrgrp vikwkkdgli lalgmddrkq qlpngslliq nilhsrhhkp deglyqceas  
 lgdsgsiisr takvmvagpl rflsqtesit afmgdvtllk cevigdpmpt ihwqknqqdl  
 npipgdsrvv vlpsgalqis rlqpgdsgvy rcsarnpast rtgneaevri lsdpglhrql  
 yflqrpsnvi aiegkdavle ccvsgyppps ftwlrgeevi qlrskkysll ggsnllisnv  
 tdddsqtytc vvtyknenis asaeltvlp pwflnhpsnl yayesmdief ecavsgkpvvp  
 tvnwmknqdv vipsdyfqiv ggsnlrilgv vksdegfyqc vaeneagnaq ssaqlivpkp  
 aipsssilps aprdvvpvlv ssrfvrlswr ppaeakgniq tftvffsreg dnreralntt  
 qpgslqltvq nlkpeamytf rvvaynewgp gessqpikva tqpelqvpgp venlhavsas  
 ptsilitwep payangpvqg yrllfctevst gkeqnievdg lsykleglkk fteytlrfla  
 ynrvgpgvst dditvvtlsd vpsappqnvsv levvnrsrik vswlpppsgt qngfitgyki  
 rhrkttrrge metlepnnlw ylftglekgs qysfqvsamt vngtgppsnw ytaetpendl  
 desqvpdpps slhvrpqtnc iimswtppln pnivvrgyii gygvgspsyae tvrvdskqry  
 ysierless hyvislkafn nagegvplye satrsitdp tdpvdyyppl ddfptsgpdv  
 stpmlppvgv qavaltheav rvswadnsvp knqktsdvrl ytvrwrtsfs asakyksedt  
 tslsyatagl kpntmyefsv mvtknrssst wsmtahatty eaaptsapk dltvitregkp  
 ravivswqpp leangkitay ilfytdkni piddwimeti sgdrllthqim dlsldtmyyf  
 riqarnakgv gplsdpilfr tlkvehpdkm andqgrhgdg gywpvdtqli drstlneppi  
 gqmhphpgsv tpqknsnllv itvvtvgvlt vlvvvivavi ctrrssaqqr kkrathsask  
 rkgsqkdlrp pdlwihheem emkniekpag tdpagrgspi qscqdltpvs hsqsseqmgs  
 ksashsgqdt eeagssmstl erslaarrat rtklmipmea qsnnpavvsa ipvptlesaq  
 ypgilpsptc gyphpqftlr pvpfptlsvd rgfgagrtvs egptaqqqpm lppaqpehps  
 seeaprtip tacvrpthpl rsfanpllp pmsaiepkvp ytpllsqppg tlpkthvкта  
 slglagkars pllpvsvpta pevseeshkp tedpasvyeq ddlseqmasl eglmkqlnai  
 tgsaf

## Netrin receptor UNC5A

mavrpglwpv llgivlaawl rgsgaqqsat vanpvpgan dllphflvep edvyivknkp  
 yllvckavpa tqiffkcngw wvrqvdhvie rstdsssglp tmevrinvsv qqvekvfgle  
 eywcqcavaws ssgttksqka yiriaylrkn feqeplakev sleqgivilpc rppegippae  
 vewlrnedlv dpsldpnvyi trehslvvrq arladtanyt cvaknivarr rstsaavivy  
 vnggwstwte wsvcsascgr gwqkrsrscet npaplnggaf cegqnvqkta catlcpvdgs  
 wsswskwsac gldcthwrsr ecspaprnge gecrgadld trnctsdcl htascpedva  
 lyiglvavav clfllllalq liyckkegl dsdvdassil tsgfqpvsvik pskadnphll  
 tiqpdlsttt ttyqgslcsr qdgpsskfqfql snghllsplg sgrhtllhss ptseaedfvs  
 rlstqnyfrs lprgtsnmay gtfnflggrl mipntgisll ippdaiprgk iyeylthlk  
 pedvrlplag cqtllspvsv cgppgvlltr pvilamdhcg epspdswslr lkkqscegs  
 edvlhlgees pshlyycqle agacyvfteq lgrfalvgea lsvaatkrllr lllfapvact  
 sleynirvyc lhdthdalke vvqlekqlgg qliqeprvlh fkdsyhnrlr sihdvpsslw  
 kskllvsyqe ipfyhiwngt qqylhctftl erinastsd ackvwwqve gdgqsfninf  
 nitkdtrfae llaleseggv palvgpsafk ipflirqkii asldppcsrg adwrtlaqkl  
 hldshlsffa skpsptamil nlwearhfpn gnlgqlaaav aglgqpdagl ftvseac

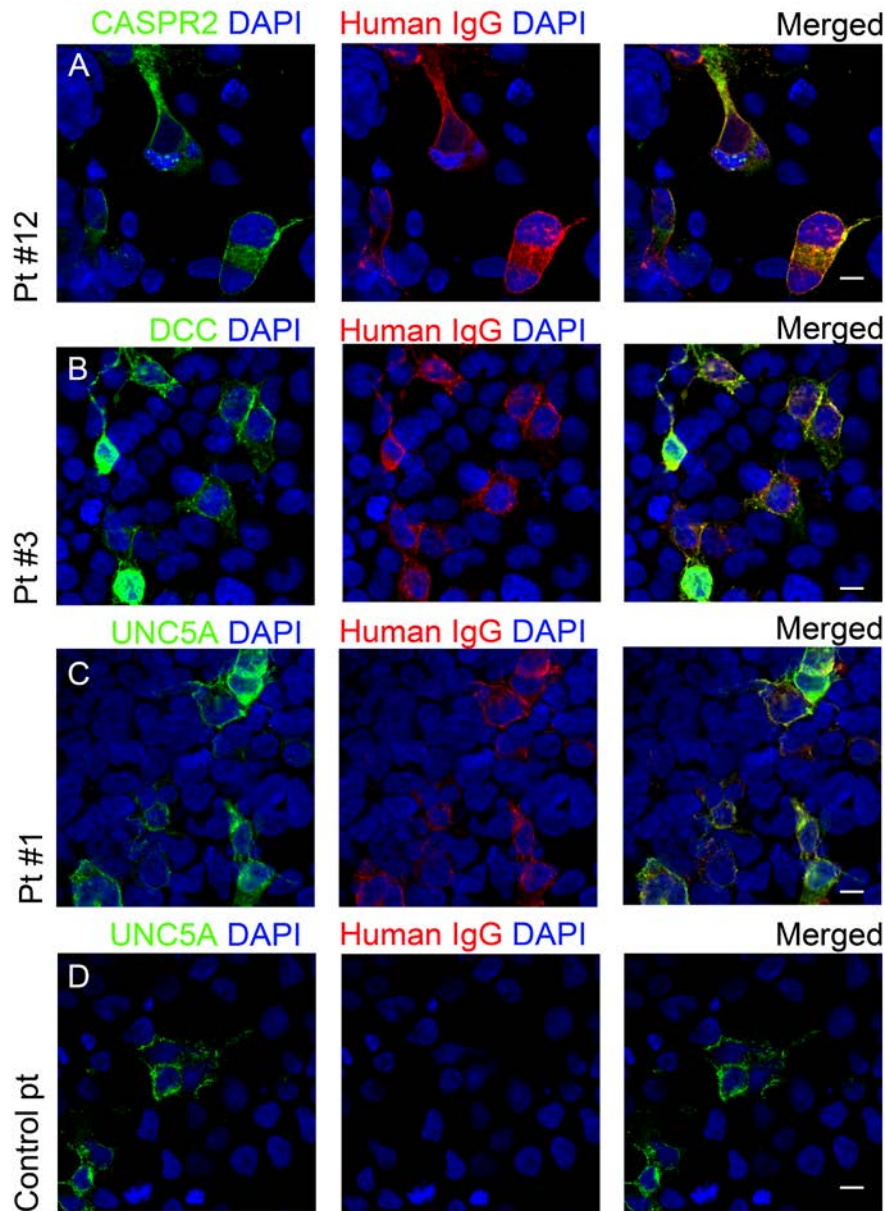

**Figure e-1. Detection of Caspr2, DCC or UNC5A antibodies with a HEK293T cell based-assay.** To test for antibodies against Caspr2, DCC or UNC5A, HEK293T cells transfected with the plasmids were exposed to patients' sera. Paraformaldehyde-prefixed cells were incubated with the corresponding commercial Caspr2 or DCC antibodies (A, B: green) and the serum of patients or controls (A-D: red). The UNC5A transfected cells were displayed with a green fluorescent UNC5A-tagged plasmid (C,D: green). The sera of patient, but not that of healthy controls, labeled the surface of cells that specifically expressed the antigens (A-D: merged images). Nuclei were counterstained with 4',6-diamino-2-phenylindole (DAPI). Scale bars: 10  $\mu$ m.

**Table e-3. Immunohistochemistry of Caspr2, DCC and UNC5A proteins in thymomas and normal thymic tissues.**

|               | Thymoma    |            |            | Normal thymus |     |    |    |     |    |     |
|---------------|------------|------------|------------|---------------|-----|----|----|-----|----|-----|
|               | patient #1 | patient #2 | patient #8 | C1            | C2  | C3 | C4 | C5  | C6 | C7  |
| <b>Caspr2</b> | +          | +++        | ++         | ++            | ++  | +  | +  | +++ | +  | +++ |
| <b>DCC</b>    | +          | +++        | +          | +             | +++ | 0  | 0  | +   | 0  | +   |
| <b>UNC5a</b>  | ++         | +          | ++         | +             | +   | +  | +  | +   | +  | +   |
| <b>CD3</b>    | +          | ++         | ++         | ++            | ++  | ++ | ++ | ++  | ++ | +++ |
| <b>CK</b>     | +++        | ++         | ++         | ++            | +   | +  | +  | +   | +  | +   |
| <b>CD20</b>   | 0          | ++         | +          | +             | +   | +  | +  | 0   | 0  | 0   |
| <b>HLA-DR</b> | 0          | +          | +          | ++            | +   | +  | ++ | ++  | ++ | +   |

Score: 0, negative; 1+, weak immunoreactivity; ++, moderate immunoreactivity; and +++, strong immunoreactivity.

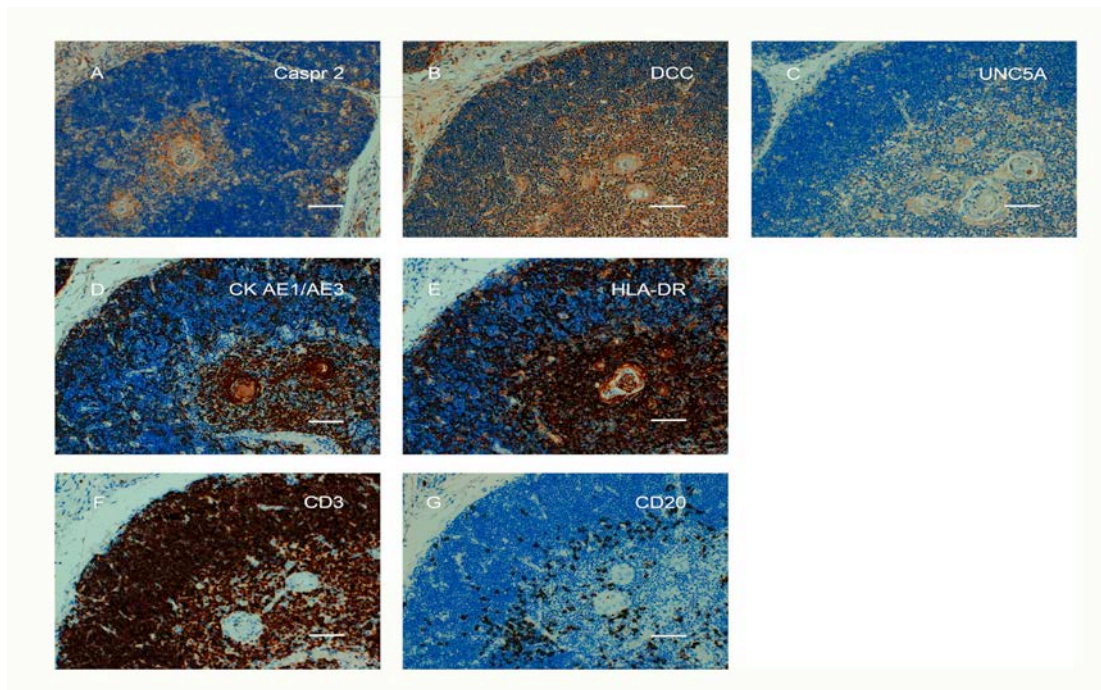

**Figure e-2. Immunohistochemical studies on normal thymus.** Sections of control #2 were immunolabeled with specific antibodies against Caspr2 (A), DCC (B), UNC5A (C), cytokeratin AE1/AE3 (D), HLA-DR (E), CD3 (F) and CD20 (G). Staining of cell surface neuronal antigens is observed in epithelial stromal cells contained in the thymic cortex and medulla. Staining is especially intense in areas surrounding the Hassall corpuscles. Scale bars: 100µm.



## References

- e1. Dunkley PR, Jarvie PE, Robinson PJ. A rapid Percoll gradient procedure for preparation of synaptosomes. *Nat Protoc* 2008;3:1718-1728.
- e2. Shevchenko A, Jensen ON, Podtelejnikov AV, et al. Linking genome and proteome by mass spectrometry: large-scale identification of yeast proteins from two dimensional gels. *Proc Natl Acad U S A* 1996;93:14440-14445.
- e3. Silva JC, Gorenstein MV, Li GZ, Vissers JP, Geromanos SJ. Absolute quantification of proteins by LCMSE: a virtue of parallel MS acquisition. *Mol Cell Proteomics* 2006;5:144-156.
